# Supplementary material for: Business intelligence and management control
Source: Royal Society of Chemistry journal article supplement (doi:10.1039/d2ra03492a), 2014-04-17
Supplement: d2ra03492a1.pdf [file d2ra03492a1.pdf]

## Theoretical Analysis of Sulfuric Acid-Dimethylamine-Oxalic Acid-Water Clusters and Implications for Atmospheric Cluster Formation

Jiao Chen<sup>1\*</sup>

<sup>1</sup>Anhui Meteorological Observatory, Hefei, Anhui 230031, China

\*E-mail: [chenjiao@mail.ustc.edu.cn](mailto:chenjiao@mail.ustc.edu.cn)

### S1 Method for Hydrate Distribution

The hydrate distribution can be given as follows:

$$\frac{\rho(1,n)}{\rho_{SA.DMA.OA}^{total}} = \frac{\rho(1,m)}{\rho(1,0) + \rho(1,1) + \dots + \rho(1,n)} = \frac{K_1 K_2 \dots \left(S \frac{p_w^{eq}}{p}\right)^m}{1 + K_1 S \frac{p_w^{eq}}{p} + \dots + K_1 K_2 \dots K_n \left(S \frac{p_w^{eq}}{p}\right)^n}$$

$$K_n = \exp\left(-\frac{\Delta G_n}{RT}\right)$$

Here,  $K_n$  represents the equilibrium which is related to the formation of stepwise hydration. S is the saturation ratio, related to the relative humidity.  $p_w^{eq}$  (kPa) is the saturation vapor pressure of water, and P is the reference pressure of 1 atm.

### S2 Method for Concentration Ratios

For following cluster forming reactions:

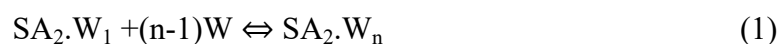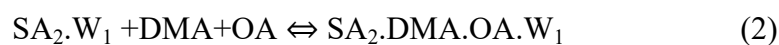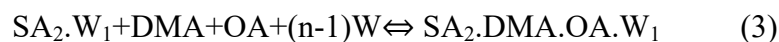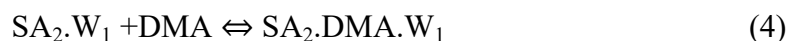

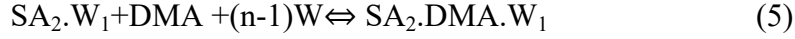

According to the law of mass balance, we can get:

$$\begin{aligned} & \frac{[SA_2.DMA.OA.W_1] + [SA_2.DMA.OA.W_2] + \dots + [SA_2.DMA.OA.W_n]}{[SA_2.W_1] + [SA_2.W_2] + \dots + [SA_2.W_n]} \\ &= [DMA][OA]\rho^{-2} \frac{K'_1 + K'_2 \left[\frac{\rho_W^{free}}{\rho}\right] + \dots + K'_n \left[\frac{\rho_W^{free}}{\rho}\right]^{n-1}}{1 + K_1 \left[\frac{\rho_W^{free}}{\rho}\right] + \dots + K_{n-1} \left[\frac{\rho_W^{free}}{\rho}\right]^{n-1}} \\ & \frac{[SA_2.DMA.W_1] + [SA_2.DMA.W_2] + \dots + [SA_2.OA.W_n]}{[SA_2.W_1] + [SA_2.W_2] + \dots + [SA_2.W_n]} \\ &= [DMA]\rho^{-1} \frac{K''_1 + K''_2 \left[\frac{\rho_W^{free}}{\rho}\right] + \dots + K''_n \left[\frac{\rho_W^{free}}{\rho}\right]^{n-1}}{1 + K_1 \left[\frac{\rho_W^{free}}{\rho}\right] + \dots + K_{n-1} \left[\frac{\rho_W^{free}}{\rho}\right]^{n-1}} \end{aligned}$$

Here  $K_{n-1}$ ,  $K'_1$ ,  $K'_n$ ,  $K''_1$ ,  $K''_n$  are the equilibrium constants of equation (1) to equation (5), respectively.  $\rho_W^{free}$  ( $\text{cm}^{-3}$ ) is the free monomer concentration of water.

$$K_n = \exp\left(-\frac{\Delta G_n}{RT}\right)$$

$$\rho_W^{free} = \frac{S}{k_B T} P_w^{eq}$$

Where,  $P_w^{eq}$  (kPa) is the saturation vapor pressure of water, the reference concentration  $\rho$  ( $\text{cm}^{-3}$ ) is given by:

$$\rho = \frac{P}{k_B T}$$

Finally, the concentration ratio of  $SA_2.DMA.OA.W_n$  to binary  $SA_2.W_n$  dimer clusters (A) and  $SA_2.DMA.W_n$  to binary  $SA_2.W_n$  dimer clusters (B) are calculated as:

$$A = [DMA][OA]\rho^{-2} \frac{K'_1 + K'_2 \left[ S \frac{P^{eq}}{W} \right] + \dots + K'_n \left[ S \frac{P^{eq}}{W} \right]^{n-1}}{1 + K_1 \left[ S \frac{P^{eq}}{W} \right] + \dots + K_{n-1} \left[ S \frac{P^{eq}}{W} \right]^{n-1}}$$

$$B = [DMA]\rho^{-1} \frac{K''_1 + K''_2 \left[ S \frac{P^{eq}}{W} \right] + \dots + K''_n \left[ S \frac{P^{eq}}{W} \right]^{n-1}}{1 + K_1 \left[ S \frac{P^{eq}}{W} \right] + \dots + K_{n-1} \left[ S \frac{P^{eq}}{W} \right]^{n-1}}$$

### S3 Method for Rayleigh Light Scattering Properties

The Rayleigh light scattering properties of the natural light ( $R_n$ , a.u.), and the parallel ( $R_{p\parallel}$ , a.u.) and perpendicular ( $R_{p\perp}$ , a.u.) components of the linearly polarized light are calculated as follows:

$$R_n = 45(\bar{\alpha})^2 + 13(\Delta\alpha)^2$$

$$R_{p\perp} = 45(\bar{\alpha})^2 + 7(\Delta\alpha)^2$$

$$R_{p\parallel} = 6(\Delta\alpha)^2$$

Here,  $\bar{\alpha}$  (a.u.) and  $\Delta\alpha$  (a.u.) represent the isotropic mean and anisotropic polarizabilities, respectively, which can be expressed as:

$$\bar{\alpha} = \frac{1}{3}(\alpha_{xx} + \alpha_{yy} + \alpha_{zz})$$

$$(\Delta\alpha)^2 = \frac{1}{2}[(\alpha_{xx} - \alpha_{yy})^2 + (\alpha_{yy} - \alpha_{zz})^2 + (\alpha_{zz} - \alpha_{xx})^2] + 3[(\alpha_{xy})^2 + (\alpha_{yz})^2 + (\alpha_{zx})^2]$$

For Rayleigh scattering,  $\sigma_n$ ,  $\sigma_p$ , and  $\sigma_c$  represent the depolarization ratio of natural, plane-polarized, and circular-polarized light, respectively. The detailed computational methods are given by:

$$\sigma_n = \frac{6(\Delta \alpha)^2}{45(\bar{\alpha})^2 + 7(\Delta \alpha)^2}$$

$$\sigma_p = \frac{3(\Delta \alpha)^2}{45(\bar{\alpha})^2 + 4(\Delta \alpha)^2}$$

$$\sigma_c = \frac{\sigma_n}{1 - \sigma_n}$$

**Table S1** Binding energies at 0 K ( $\Delta E$ ), and enthalpies at 298.15 K ( $\Delta H$ ) for  $SA_m.DMA.OA.W_n$  ( $m=1-2, n=0-4$ ) according to reaction path 1. Energies are calculated at DF-LMP2-F12/VDZ-F12//M06-2x/6-311+G(2d, p) level of theory (in kcal/mol).

| Reactions                                             | $\Delta E$ | $\Delta H$ | $\Delta G$ |
|-------------------------------------------------------|------------|------------|------------|
| $SA + DMA + OA \Leftrightarrow SA.DMA.OA$             | -43.78     | -41.01     | -19.83     |
| $SA + DMA + OA + W \Leftrightarrow SA.DMA.OA.W_1$     | -58.44     | -53.46     | -21.30     |
| $SA + DMA + OA + 2W \Leftrightarrow SA.DMA.OA.W_2$    | -68.20     | -61.68     | -20.75     |
| $SA + DMA + OA + 3W \Leftrightarrow SA.DMA.OA.W_3$    | -76.74     | -67.78     | -16.19     |
| $SA + DMA + OA + 4W \Leftrightarrow SA.DMA.OA.W_4$    | -88.5      | -77.46     | -16.82     |
| $2SA + DMA + OA \Leftrightarrow SA_2.DMA.OA$          | -67.20     | -62.50     | -29.85     |
| $2SA + DMA + OA + W \Leftrightarrow SA_2.DMA.OA.W_1$  | -77.70     | -71.59     | -29.44     |
| $2SA + DMA + OA + 2W \Leftrightarrow SA_2.DMA.OA.W_2$ | -93.41     | -85.51     | -30.14     |
| $2SA + DMA + OA + 3W \Leftrightarrow SA_2.DMA.OA.W_3$ | -104.7     | -86.49     | -33.27     |
| $2SA + DMA + OA + 4W \Leftrightarrow SA_2.DMA.OA.W_4$ | -112.40    | -101.14    | -27.45     |

**Table S2** Binding energies at 0 K ( $\Delta E$ ), and enthalpies at 298.15 K ( $\Delta H$ ) for  $SA_m.DMA.OA.W_n$  ( $m=1-2, n=0-4$ ) according to reaction path 2. Energies are calculated at DF-LMP2-F12/VDZ-F12//M06-2x/6-311+G(2d, p) level of theory (in kcal/mol).

| Reactions                                                | $\Delta E$ | $\Delta H$ | $\Delta G$ |
|----------------------------------------------------------|------------|------------|------------|
| $SA.DMA.OA + W \rightleftharpoons SA.DMA.OA.W_1$         | -14.70     | -12.50     | -1.47      |
| $SA.DMA.OA.W_1 + W \rightleftharpoons SA.DMA.OA.W_2$     | -9.75      | -8.22      | 0.56       |
| $SA.DMA.OA.W_2 + W \rightleftharpoons SA.DMA.OA.W_3$     | -7.74      | -6.34      | 2.84       |
| $SA.DMA.OA.W_3 + W \rightleftharpoons SA.DMA.OA.W_4$     | -11.80     | -9.68      | -0.63      |
| $SA_2.DMA.OA + W \rightleftharpoons SA_2.DMA.OA.W_1$     | -9.19      | -8.26      | -0.11      |
| $SA_2.DMA.OA.W_1 + W \rightleftharpoons SA_2.DMA.OA.W_2$ | -13.20     | -11.40     | -1.26      |
| $SA_2.DMA.OA.W_2 + W \rightleftharpoons SA_2.DMA.OA.W_3$ | -11.30     | -9.63      | 1.00       |
| $SA_2.DMA.OA.W_3 + W \rightleftharpoons SA_2.DMA.OA.W_4$ | -7.69      | -5.99      | 1.69       |

**Table S3** Binding energies at 0 K ( $\Delta E$ ), and enthalpies at 298.15 K ( $\Delta H$ ) for  $SA_m.DMA.OA.W_n$  ( $m=1-2$ ,  $n=0-4$ ) according to the reaction path 3. Energies are calculated at DF-LMP2-F12/VDZ-F12//M06-2x/6-311+G(2d, p) level of theory (in kcal/mol).

| Reactions                                              | $\Delta E$ | $\Delta H$ | $\Delta G$ |
|--------------------------------------------------------|------------|------------|------------|
| $SA.DMA + OA \rightleftharpoons SA.DMA.OA$             | -18.42     | -17.37     | -6.14      |
| $SA.DMA.W_1 + OA \rightleftharpoons SA.DMA.OA.W_1$     | -18.38     | -17.47     | -4.66      |
| $SA.DMA.W_2 + OA \rightleftharpoons SA.DMA.OA.W_2$     | -16.40     | -16.17     | -4.53      |
| $SA.DMA.W_3 + OA \rightleftharpoons SA.DMA.OA.W_3$     | -14.32     | -13.01     | -0.63      |
| $SA.DMA.W_4 + OA \rightleftharpoons SA.DMA.OA.W_4$     | -14.09     | -13.31     | -2.02      |
| $SA_2.DMA + OA \rightleftharpoons SA_2.DMA.OA$         | -11.23     | -10.52     | -0.09      |
| $SA_2.DMA.W_1 + OA \rightleftharpoons SA_2.DMA.OA.W_1$ | -10.44     | -9.91      | -0.31      |
| $SA_2.DMA.W_2 + OA \rightleftharpoons SA_2.DMA.OA.W_2$ | -16.19     | -15.32     | -0.76      |
| $SA_2.DMA.W_3 + OA \rightleftharpoons SA_2.DMA.OA.W_3$ | -10.15     | -9.37      | 3.62       |
| $SA_2.DMA.W_4 + OA \rightleftharpoons SA_2.DMA.OA.W_4$ | -5.715     | -5.07      | 6.55       |

**Table S4** Binding energies at 0 K ( $\Delta E$ ), and enthalpies at 298.15 K ( $\Delta H$ ) for  $SA_m.DMA.OA.W_n$  ( $m=1-2, n=0-4$ ) according to reaction path 4. Energies are calculated at DF-LMP2-F12/VDZ-F12//M06-2x/6-311+G(2d, p) level of theory (in kcal/mol).

| Reactions                                                  | $\Delta E$ | $\Delta H$ | $\Delta G$ |
|------------------------------------------------------------|------------|------------|------------|
| $SA.DMA + OA \rightleftharpoons SA.DMA.OA$                 | -18.42     | -17.37     | -6.14      |
| $SA.DMA + OA + W \rightleftharpoons SA.DMA.OA.W_1$         | -33.08     | -29.82     | -7.61      |
| $SA.DMA + OA + 2W \rightleftharpoons SA.DMA.OA.W_2$        | -42.83     | -38.04     | -7.06      |
| $SA.DMA + OA + 3W \rightleftharpoons SA.DMA.OA.W_3$        | -51.38     | -44.14     | -2.50      |
| $SA.DMA + OA + 4W \rightleftharpoons SA.DMA.OA.W_4$        | -63.16     | -53.82     | -3.12      |
| $SA.DMA + SA + OA \rightleftharpoons SA_2.DMA.OA$          | -41.82     | -38.85     | -16.15     |
| $SA.DMA + SA + OA + W \rightleftharpoons SA_2.DMA.OA.W_1$  | -52.35     | -47.95     | -15.75     |
| $SA.DMA + SA + OA + 2W \rightleftharpoons SA_2.DMA.OA.W_2$ | -68.04     | -61.87     | -16.44     |
| $SA.DMA + SA + OA + 3W \rightleftharpoons SA_2.DMA.OA.W_3$ | -79.36     | -71.51     | -15.44     |
| $SA.DMA + SA + OA + 4W \rightleftharpoons SA_2.DMA.OA.W_4$ | -87.05     | -77.5      | -13.76     |



**Table S5** Binding energies at 0 K ( $\Delta E$ ), and enthalpies at 298.15 K ( $\Delta H$ ) for  $SA_m.DMA.OA.W_n$  ( $m=1-2$ ,  $n=0-4$ ) according to the reaction path 5. Energies are calculated at DF-LMP2-F12/VDZ-F12//M06-2x/6-311+G(2d, p) level of theory (in kcal/mol).

| Reactions                                                  | $\Delta E$ | $\Delta H$ | $\Delta G$ |
|------------------------------------------------------------|------------|------------|------------|
| $SA.OA + DMA \rightleftharpoons SA.DMA.OA$                 | -31.19     | -29.32     | -17.45     |
| $SA.OA + DMA + W \rightleftharpoons SA.DMA.OA.W_1$         | -45.85     | -41.78     | -18.92     |
| $SA.OA + DMA + 2W \rightleftharpoons SA.DMA.OA.W_2$        | -55.6      | -49.99     | -18.37     |
| $SA.OA + DMA + 3W \rightleftharpoons SA.DMA.OA.W_3$        | -64.15     | -56.09     | -13.81     |
| $SA.OA + DMA + 4W \rightleftharpoons SA.DMA.OA.W_4$        | -75.93     | -65.77     | -14.43     |
| $SA.OA + SA + DMA \rightleftharpoons SA_2.DMA.OA$          | -54.59     | -50.81     | -27.46     |
| $SA.OA + SA + DMA + W \rightleftharpoons SA_2.DMA.OA.W_1$  | -65.12     | -59.9      | -27.06     |
| $SA.OA + SA + DMA + 2W \rightleftharpoons SA_2.DMA.OA.W_2$ | -80.81     | -73.83     | -27.75     |
| $SA.OA + SA + DMA + 3W \rightleftharpoons SA_2.DMA.OA.W_3$ | -92.13     | -83.46     | -26.75     |
| $SA.OA + SA + DMA + 4W \rightleftharpoons SA_2.DMA.OA.W_4$ | -99.82     | -89.45     | -25.07     |

**Table S6** Binding energies at 0 K ( $\Delta E$ ), and enthalpies at 298.15 K ( $\Delta H$ ) for  $SA_m$ .DMA.OA.W<sub>n</sub> (m=1-2, n=0-4) according to the reaction path 6. Energies are calculated at DF-LMP2-F12/VDZ-F12//M06-2x/6-311+G(2d, p) level of theory (in kcal/mol).

| Reactions                                                                  | $\Delta E$ | $\Delta H$ | $\Delta G$ |
|----------------------------------------------------------------------------|------------|------------|------------|
| DMA.OA + SA $\Leftrightarrow$ SA.DMA.OA                                    | -28.72     | -26.82     | -15.68     |
| DMA.OA + SA + W $\Leftrightarrow$ SA.DMA.OA.W <sub>1</sub>                 | -43.38     | -39.27     | -17.14     |
| DMA.OA + SA + 2W $\Leftrightarrow$ SA.DMA.OA.W <sub>2</sub>                | -53.14     | -47.49     | -16.59     |
| DMA.OA + SA + 3W $\Leftrightarrow$ SA.DMA.OA.W <sub>3</sub>                | -61.68     | -53.59     | -12.03     |
| DMA.OA + SA + 4W $\Leftrightarrow$ SA.DMA.OA.W <sub>4</sub>                | -73.46     | -63.26     | -12.66     |
| DMA.OA + 2SA $\Leftrightarrow$ SA <sub>2</sub> .DMA.OA                     | -52.13     | -48.3      | -25.69     |
| DMA.OA + 2SA + W $\Leftrightarrow$ SA <sub>2</sub> .DMA.OA.W <sub>1</sub>  | -62.65     | -57.39     | -25.28     |
| DMA.OA + 2SA + 2W $\Leftrightarrow$ SA <sub>2</sub> .DMA.OA.W <sub>2</sub> | -78.35     | -71.32     | -25.98     |
| DMA.OA + 2SA + 3W $\Leftrightarrow$ SA <sub>2</sub> .DMA.OA.W <sub>3</sub> | -89.66     | -80.95     | -24.97     |
| DMA.OA + 2SA + 4W $\Leftrightarrow$ SA <sub>2</sub> .DMA.OA.W <sub>4</sub> | -97.35     | -86.94     | -23.29     |

**Table S7** The isotropic mean polarizability ( $\bar{\alpha}$ ) and Rayleigh scattering intensity ( $R_n$ ) of different isomer.

| cluster               | $\bar{\alpha}$ (a.u.) | $R_n$ (a.u.) |
|-----------------------|-----------------------|--------------|
| SA.W <sub>1</sub>     | 47                    | 101559       |
| SA.W <sub>2</sub>     | 57                    | 149497       |
| SA.W <sub>3</sub>     | 67                    | 208501       |
| SA.W <sub>4</sub>     | 77                    | 275196       |
| DMA.OA.W <sub>1</sub> | 88                    | 358182       |
| DMA.OA.W <sub>2</sub> | 97                    | 432831       |
| DMA.OA.W <sub>3</sub> | 107                   | 531651       |
| DMA.OA.W <sub>4</sub> | 116                   | 613278       |
| SA.DMA.W <sub>1</sub> | 85                    | 325585       |
| SA.DMA.W <sub>2</sub> | 94                    | 397929       |
| SA.DMA.W <sub>3</sub> | 104                   | 491654       |
| SA.DMA.W <sub>4</sub> | 113                   | 578366       |

Cartesian coordinates of optimized structures:

SA.DMA.OA

|    |              |              |              |
|----|--------------|--------------|--------------|
| 16 | 2.446833000  | -0.521582000 | -0.017725000 |
| 8  | 1.932345000  | 0.842661000  | -0.067582000 |
| 8  | 3.812110000  | -0.720732000 | -0.385860000 |
| 8  | 2.308424000  | -0.861971000 | 1.551417000  |
| 8  | 1.521899000  | -1.473163000 | -0.688222000 |
| 1  | 2.785143000  | -1.686773000 | 1.716964000  |
| 1  | -1.290118000 | 1.581228000  | 0.243155000  |
| 6  | -0.435629000 | 2.456801000  | -1.404324000 |
| 7  | -0.421370000 | 2.096825000  | 0.031502000  |
| 6  | -0.239232000 | 3.251725000  | 0.932453000  |
| 1  | -0.581301000 | 1.543510000  | -1.975509000 |
| 1  | 0.524700000  | 2.901094000  | -1.657404000 |
| 1  | -1.246511000 | 3.158443000  | -1.590394000 |
| 1  | 0.375049000  | 1.432044000  | 0.155187000  |
| 1  | -0.250530000 | 2.902457000  | 1.961915000  |
| 1  | -1.043827000 | 3.966643000  | 0.772199000  |
| 1  | 0.722421000  | 3.712298000  | 0.714597000  |
| 8  | -4.061299000 | -1.182542000 | 0.368242000  |
| 6  | -2.979452000 | -0.460981000 | 0.177365000  |
| 8  | -2.947126000 | 0.735728000  | 0.303840000  |
| 6  | -1.749131000 | -1.317994000 | -0.210146000 |
| 8  | -0.714461000 | -0.597044000 | -0.463255000 |
| 8  | -1.880541000 | -2.518490000 | -0.228596000 |
| 1  | -3.802839000 | -2.112950000 | 0.223891000  |
| 1  | 0.257912000  | -1.103331000 | -0.593485000 |

SA.DMA.OA.W<sub>1</sub>

|    |             |              |              |
|----|-------------|--------------|--------------|
| 16 | 2.194129000 | -0.921173000 | -0.040280000 |
| 8  | 3.601491000 | -0.980014000 | 0.119387000  |
| 8  | 1.551462000 | -0.473080000 | 1.310881000  |
| 8  | 1.635963000 | -0.064849000 | -1.074438000 |
| 8  | 1.654540000 | -2.359440000 | -0.250676000 |
| 1  | 0.607494000 | 1.274456000  | -0.491363000 |
| 1  | 0.641292000 | -2.334966000 | -0.250153000 |
| 6  | 0.841846000 | 2.578311000  | 1.090297000  |
| 7  | 0.384669000 | 2.263865000  | -0.283790000 |
| 6  | 1.033213000 | 3.089369000  | -1.323804000 |
| 1  | 0.258424000 | 1.981751000  | 1.786523000  |
| 1  | 0.676018000 | 3.637390000  | 1.277591000  |
| 1  | 1.897750000 | 2.330092000  | 1.177203000  |

|   |              |              |              |
|---|--------------|--------------|--------------|
| 1 | -0.650481000 | 2.367758000  | -0.296873000 |
| 1 | 0.660142000  | 2.785316000  | -2.298711000 |
| 1 | 2.107082000  | 2.919622000  | -1.279672000 |
| 1 | 0.807355000  | 4.138268000  | -1.142446000 |
| 8 | -3.493171000 | -2.032575000 | -0.553280000 |
| 6 | -2.955545000 | -0.931052000 | -0.066315000 |
| 8 | -3.580403000 | 0.072131000  | 0.142883000  |
| 6 | -1.431588000 | -1.051108000 | 0.199030000  |
| 8 | -0.886809000 | -0.065468000 | 0.736070000  |
| 8 | -0.924445000 | -2.128079000 | -0.163733000 |
| 1 | -2.768448000 | -2.677621000 | -0.647975000 |
| 1 | 0.543133000  | -0.340024000 | 1.155703000  |
| 8 | -2.289797000 | 2.537084000  | 0.232224000  |
| 1 | -3.032079000 | 3.017921000  | -0.142938000 |
| 1 | -2.624624000 | 1.632960000  | 0.394348000  |

SA.DMA.OA.W<sub>2</sub>

|    |              |              |              |
|----|--------------|--------------|--------------|
| 16 | 2.194129000  | -0.921173000 | -0.040280000 |
| 8  | 3.601491000  | -0.980014000 | 0.119387000  |
| 8  | 1.551462000  | -0.473080000 | 1.310881000  |
| 8  | 1.635963000  | -0.064849000 | -1.074438000 |
| 8  | 1.654540000  | -2.359440000 | -0.250676000 |
| 1  | 0.607494000  | 1.274456000  | -0.491363000 |
| 1  | 0.641292000  | -2.334966000 | -0.250153000 |
| 6  | 0.841846000  | 2.578311000  | 1.090297000  |
| 7  | 0.384669000  | 2.263865000  | -0.283790000 |
| 6  | 1.033213000  | 3.089369000  | -1.323804000 |
| 1  | 0.258424000  | 1.981751000  | 1.786523000  |
| 1  | 0.676018000  | 3.637390000  | 1.277591000  |
| 1  | 1.897750000  | 2.330092000  | 1.177203000  |
| 1  | -0.650481000 | 2.367758000  | -0.296873000 |
| 1  | 0.660142000  | 2.785316000  | -2.298711000 |
| 1  | 2.107082000  | 2.919622000  | -1.279672000 |
| 1  | 0.807355000  | 4.138268000  | -1.142446000 |
| 8  | -3.493171000 | -2.032575000 | -0.553280000 |
| 6  | -2.955545000 | -0.931052000 | -0.066315000 |
| 8  | -3.580403000 | 0.072131000  | 0.142883000  |
| 6  | -1.431588000 | -1.051108000 | 0.199030000  |
| 8  | -0.886809000 | -0.065468000 | 0.736070000  |
| 8  | -0.924445000 | -2.128079000 | -0.163733000 |
| 1  | -2.768448000 | -2.677621000 | -0.647975000 |
| 1  | 0.543133000  | -0.340024000 | 1.155703000  |
| 8  | -2.289797000 | 2.537084000  | 0.232224000  |
| 1  | -3.032079000 | 3.017921000  | -0.142938000 |

|   |              |             |             |
|---|--------------|-------------|-------------|
| 1 | -2.624624000 | 1.632960000 | 0.394348000 |
|---|--------------|-------------|-------------|

SA.DMA.OA.W<sub>3</sub>

|    |              |              |              |
|----|--------------|--------------|--------------|
| 16 | 2.354285000  | -0.824236000 | 0.049984000  |
| 8  | 3.057427000  | 0.302909000  | -0.519526000 |
| 8  | 1.934896000  | -1.826103000 | -0.934075000 |
| 8  | 3.368052000  | -1.582978000 | 1.029760000  |
| 8  | 1.273807000  | -0.427546000 | 0.954026000  |
| 1  | 4.087048000  | -1.947124000 | 0.495416000  |
| 1  | 0.850668000  | 1.183089000  | 0.016305000  |
| 8  | -0.605215000 | -2.037694000 | -0.905353000 |
| 6  | -1.192594000 | -0.891131000 | -1.046327000 |
| 8  | -0.691570000 | 0.163276000  | -1.357905000 |
| 6  | -2.694245000 | -0.981526000 | -0.712175000 |
| 8  | -3.336566000 | 0.126355000  | -1.086096000 |
| 8  | -3.197698000 | -1.908891000 | -0.155415000 |
| 1  | 0.408125000  | -1.950663000 | -0.991651000 |
| 1  | -4.226727000 | 0.085676000  | -0.705107000 |
| 6  | 1.602704000  | 2.782372000  | 1.030633000  |
| 7  | 0.779353000  | 2.207645000  | -0.052887000 |
| 6  | 1.192012000  | 2.644192000  | -1.405120000 |
| 1  | 1.239977000  | 2.401912000  | 1.982448000  |
| 1  | 1.524493000  | 3.867602000  | 1.000763000  |
| 1  | 2.631705000  | 2.463116000  | 0.877934000  |
| 1  | -0.238519000 | 2.416340000  | 0.078859000  |
| 1  | 0.563038000  | 2.136351000  | -2.131471000 |
| 1  | 2.231000000  | 2.361727000  | -1.554709000 |
| 1  | 1.064023000  | 3.722992000  | -1.476098000 |
| 8  | -1.944125000 | 2.525914000  | 0.028011000  |
| 1  | -2.127332000 | 1.950291000  | -0.727609000 |
| 1  | -2.348674000 | 2.038282000  | 0.772396000  |
| 8  | -2.993255000 | 0.726499000  | 1.845353000  |
| 1  | -2.348543000 | -0.005527000 | 1.967878000  |
| 1  | -3.427933000 | 0.846849000  | 2.692906000  |
| 8  | -1.200638000 | -1.303660000 | 1.964516000  |
| 1  | -1.498699000 | -2.069971000 | 1.459658000  |
| 1  | -0.275852000 | -1.154784000 | 1.704110000  |

SA.DMA.OA.W<sub>4</sub>

|    |              |              |              |
|----|--------------|--------------|--------------|
| 16 | 0.605551000  | -1.314494000 | -0.644222000 |
| 8  | 1.851167000  | -1.545020000 | -1.356513000 |
| 8  | -0.172867000 | -0.173304000 | -1.082363000 |
| 8  | -0.345533000 | -2.559411000 | -1.010309000 |
| 8  | 0.777659000  | -1.370446000 | 0.813586000  |

|   |              |              |              |
|---|--------------|--------------|--------------|
| 1 | 0.198256000  | -3.358890000 | -1.030429000 |
| 1 | 2.643775000  | -1.238897000 | 1.286092000  |
| 8 | -3.311084000 | 0.123810000  | -1.697777000 |
| 6 | -2.755567000 | 0.777633000  | -0.691734000 |
| 8 | -2.535346000 | 1.952774000  | -0.705093000 |
| 6 | -2.394326000 | -0.078372000 | 0.540230000  |
| 8 | -2.774191000 | -1.325556000 | 0.412426000  |
| 8 | -1.812498000 | 0.404816000  | 1.475570000  |
| 1 | -3.314468000 | -0.824003000 | -1.490990000 |
| 1 | -2.305215000 | -1.891906000 | 1.126394000  |
| 6 | -0.339779000 | 3.126356000  | 1.437842000  |
| 7 | 0.248500000  | 2.248194000  | 0.406701000  |
| 6 | 0.381925000  | 2.896132000  | -0.917525000 |
| 1 | -0.382154000 | 2.580648000  | 2.376436000  |
| 1 | -1.346540000 | 3.393855000  | 1.125011000  |
| 1 | 0.286577000  | 4.010787000  | 1.540165000  |
| 1 | -0.328919000 | 1.406100000  | 0.314329000  |
| 1 | 0.741345000  | 2.151209000  | -1.623417000 |
| 1 | 1.096731000  | 3.712337000  | -0.826229000 |
| 1 | -0.591533000 | 3.262995000  | -1.231822000 |
| 8 | 2.861446000  | 1.736192000  | 0.846707000  |
| 1 | 3.286464000  | 1.561948000  | -0.009016000 |
| 1 | 1.213665000  | 1.939654000  | 0.688485000  |
| 8 | 3.516484000  | -0.861345000 | 1.479684000  |
| 1 | 3.083769000  | 0.919516000  | 1.338815000  |
| 1 | 4.000035000  | -0.914626000 | 0.645791000  |
| 8 | 3.924522000  | 0.255827000  | -1.285998000 |
| 1 | 3.181593000  | -0.347578000 | -1.475928000 |
| 1 | 4.464722000  | 0.288523000  | -2.078947000 |
| 8 | -1.329872000 | -2.556463000 | 2.095973000  |
| 1 | -1.417015000 | -2.139685000 | 2.959711000  |
| 1 | -0.492028000 | -2.202905000 | 1.726170000  |

SA<sub>2</sub>.DMA.OA

|    |              |              |              |
|----|--------------|--------------|--------------|
| 16 | 2.428883000  | -0.781363000 | -0.630894000 |
| 8  | 1.823831000  | -2.009692000 | -1.139350000 |
| 8  | 2.927309000  | -0.829975000 | 0.724658000  |
| 8  | 3.746142000  | -0.575340000 | -1.503002000 |
| 8  | 1.588745000  | 0.401624000  | -0.881235000 |
| 1  | 3.517387000  | -0.688805000 | -2.436055000 |
| 1  | 0.477690000  | 1.022418000  | 1.198642000  |
| 16 | -1.452970000 | 1.846287000  | -0.906692000 |
| 8  | -0.863285000 | 2.019657000  | 0.401917000  |
| 8  | -1.396944000 | 2.924181000  | -1.827195000 |

|   |              |              |              |
|---|--------------|--------------|--------------|
| 8 | -0.891420000 | 0.525093000  | -1.523045000 |
| 8 | -2.953506000 | 1.451301000  | -0.750050000 |
| 1 | 0.096711000  | 0.435301000  | -1.319365000 |
| 1 | -3.037430000 | 0.667645000  | -0.159777000 |
| 6 | 0.643810000  | 0.982751000  | 3.240101000  |
| 7 | 1.238363000  | 1.073321000  | 1.892031000  |
| 6 | 1.988020000  | 2.324068000  | 1.642962000  |
| 1 | 0.126518000  | 0.030728000  | 3.321547000  |
| 1 | -0.063693000 | 1.801111000  | 3.358949000  |
| 1 | 1.432753000  | 1.056447000  | 3.986018000  |
| 1 | 1.846884000  | 0.262165000  | 1.687583000  |
| 1 | 2.380264000  | 2.282366000  | 0.630184000  |
| 1 | 2.797896000  | 2.403811000  | 2.365379000  |
| 1 | 1.299612000  | 3.160714000  | 1.740456000  |
| 8 | -0.612973000 | -2.559789000 | -0.588702000 |
| 6 | -1.028866000 | -1.780691000 | 0.359074000  |
| 8 | -0.378878000 | -1.025592000 | 1.038233000  |
| 6 | -2.545029000 | -1.868108000 | 0.560899000  |
| 8 | -2.976733000 | -3.107444000 | 0.707180000  |
| 8 | -3.254500000 | -0.897067000 | 0.603847000  |
| 1 | 0.370327000  | -2.386750000 | -0.775999000 |
| 1 | -3.937987000 | -3.082957000 | 0.835332000  |

SA<sub>2</sub>.DMA.OA.W<sub>1</sub>

|    |              |              |              |
|----|--------------|--------------|--------------|
| 16 | 0.363452000  | 1.911125000  | 0.624766000  |
| 8  | 1.562264000  | 1.568835000  | 1.390085000  |
| 8  | 0.568549000  | 2.350698000  | -0.729615000 |
| 8  | -0.664647000 | 0.863820000  | 0.777585000  |
| 8  | -0.232494000 | 3.204062000  | 1.348447000  |
| 1  | -2.048409000 | 0.978208000  | 0.143541000  |
| 1  | -0.236993000 | 3.049146000  | 2.303043000  |
| 16 | 2.900846000  | -1.007741000 | -0.459281000 |
| 8  | 3.100433000  | -2.407704000 | -0.284270000 |
| 8  | 1.581362000  | -0.541714000 | -0.852675000 |
| 8  | 3.257060000  | -0.296974000 | 0.881313000  |
| 8  | 3.923951000  | -0.465191000 | -1.471080000 |
| 1  | 2.617434000  | 0.465563000  | 1.047023000  |
| 1  | 3.632625000  | 0.489917000  | -1.722439000 |
| 6  | -0.283744000 | -3.295305000 | 0.140347000  |
| 7  | -0.232010000 | -1.928401000 | 0.707454000  |
| 6  | 0.504690000  | -1.846014000 | 1.990878000  |
| 1  | -0.896384000 | -3.276176000 | -0.757616000 |
| 1  | -0.725156000 | -3.966919000 | 0.873669000  |
| 1  | 0.733155000  | -3.602530000 | -0.098666000 |



|   |              |              |              |
|---|--------------|--------------|--------------|
| 1 | -1.185870000 | -1.549940000 | 0.801472000  |
| 1 | 0.568258000  | -0.799059000 | 2.279337000  |
| 1 | 1.501766000  | -2.258218000 | 1.842252000  |
| 1 | -0.032149000 | -2.421048000 | 2.742731000  |
| 8 | -5.435378000 | 0.788013000  | -1.134007000 |
| 6 | -4.940191000 | -0.358778000 | -0.670074000 |
| 8 | -5.539430000 | -1.383059000 | -0.659133000 |
| 6 | -3.491986000 | -0.268547000 | -0.131572000 |
| 8 | -2.931116000 | -1.241606000 | 0.303983000  |
| 8 | -3.001774000 | 0.941662000  | -0.216838000 |
| 1 | -4.770574000 | 1.487160000  | -1.051079000 |
| 1 | 0.251402000  | -1.305489000 | 0.036838000  |
| 8 | 3.018860000  | 1.846458000  | -1.950750000 |
| 1 | 3.486572000  | 2.624985000  | -1.635012000 |
| 1 | 2.105907000  | 1.922533000  | -1.606849000 |

SA<sub>2</sub>.DMA.OA.W<sub>2</sub>

|    |              |              |              |
|----|--------------|--------------|--------------|
| 16 | -2.578415000 | 0.744540000  | 0.320508000  |
| 8  | -1.522056000 | 1.203103000  | 1.190315000  |
| 8  | -2.247674000 | 0.891973000  | -1.109493000 |
| 8  | -3.123184000 | -0.567870000 | 0.651711000  |
| 8  | -3.809672000 | 1.750233000  | 0.473256000  |
| 1  | -2.411853000 | -1.933493000 | 0.190410000  |
| 1  | -4.268768000 | 1.541096000  | 1.298534000  |
| 16 | 0.987803000  | -1.751122000 | 1.098373000  |
| 8  | 0.734270000  | -1.088090000 | 2.353605000  |
| 8  | 0.228086000  | -2.993445000 | 0.876600000  |
| 8  | 0.944336000  | -0.872528000 | -0.063528000 |
| 8  | 2.508634000  | -2.247022000 | 1.246721000  |
| 1  | 0.600364000  | 0.830488000  | 1.852753000  |
| 1  | 2.703528000  | -2.855906000 | 0.521520000  |
| 8  | 3.105262000  | 0.181443000  | -2.609184000 |
| 6  | 2.388319000  | 0.951930000  | -1.812275000 |
| 8  | 2.847840000  | 1.660137000  | -0.965330000 |
| 6  | 0.875224000  | 0.837218000  | -2.074318000 |
| 8  | 0.177417000  | 1.620893000  | -1.314889000 |
| 8  | 0.478505000  | 0.068137000  | -2.921150000 |
| 1  | 2.486154000  | -0.304836000 | -3.180683000 |
| 1  | -0.814961000 | 1.375669000  | -1.312471000 |
| 6  | 0.809030000  | 2.896925000  | 2.034997000  |
| 7  | 1.239494000  | 1.574048000  | 1.531306000  |
| 6  | 2.624359000  | 1.219202000  | 1.923526000  |
| 1  | -0.215293000 | 3.068340000  | 1.719431000  |
| 1  | 1.474482000  | 3.653024000  | 1.623512000  |

|   |              |              |              |
|---|--------------|--------------|--------------|
| 1 | 0.874567000  | 2.894169000  | 3.121160000  |
| 1 | 1.159399000  | 1.560653000  | 0.507270000  |
| 1 | 2.906033000  | 0.299448000  | 1.419742000  |
| 1 | 2.647946000  | 1.076037000  | 3.001400000  |
| 1 | 3.287068000  | 2.024365000  | 1.616526000  |
| 8 | -1.936895000 | -2.668285000 | -0.296730000 |
| 1 | -1.811907000 | -2.285680000 | -1.249908000 |
| 1 | -1.019018000 | -2.824645000 | 0.173287000  |
| 8 | -1.847277000 | -1.512612000 | -2.525139000 |
| 1 | -2.329253000 | -0.708240000 | -2.269404000 |
| 1 | -0.977469000 | -1.163707000 | -2.780019000 |

SA<sub>2</sub>.DMA.OA.W<sub>3</sub>

|    |              |              |              |
|----|--------------|--------------|--------------|
| 16 | -2.392312000 | 1.120212000  | -0.552657000 |
| 8  | -2.497420000 | 0.258550000  | 0.621744000  |
| 8  | -2.038082000 | 0.357453000  | -1.765034000 |
| 8  | -3.894658000 | 1.598373000  | -0.764044000 |
| 8  | -1.574165000 | 2.298068000  | -0.370620000 |
| 1  | -3.928525000 | 2.201321000  | -1.520594000 |
| 1  | 0.241332000  | 2.204533000  | 0.333844000  |
| 16 | 0.519121000  | -1.857041000 | 1.121276000  |
| 8  | -0.466286000 | -2.367172000 | 2.048849000  |
| 8  | 1.890548000  | -1.802857000 | 1.544825000  |
| 8  | 0.382649000  | -2.486515000 | -0.226104000 |
| 8  | 0.132673000  | -0.313874000 | 0.876749000  |
| 1  | -0.918426000 | -2.369057000 | -0.825770000 |
| 1  | -0.846532000 | -0.208838000 | 0.926447000  |
| 8  | 2.730206000  | -1.820513000 | -1.534637000 |
| 6  | 2.840759000  | -0.512339000 | -1.504618000 |
| 8  | 3.879172000  | 0.067232000  | -1.365872000 |
| 6  | 1.540018000  | 0.309854000  | -1.675287000 |
| 8  | 0.557582000  | -0.383537000 | -2.217477000 |
| 8  | 1.484014000  | 1.462177000  | -1.350382000 |
| 1  | 1.811735000  | -2.114715000 | -1.362862000 |
| 1  | -0.273291000 | 0.141872000  | -2.198114000 |
| 6  | 1.534255000  | 3.754746000  | 0.702862000  |
| 7  | 0.879919000  | 2.486288000  | 1.087779000  |
| 6  | 0.121119000  | 2.571692000  | 2.351994000  |
| 1  | 2.059958000  | 3.593542000  | -0.234392000 |
| 1  | 2.235046000  | 4.036855000  | 1.486279000  |
| 1  | 0.773876000  | 4.524161000  | 0.582208000  |
| 1  | 1.619337000  | 1.743018000  | 1.155834000  |
| 1  | -0.307887000 | 1.596598000  | 2.568133000  |
| 1  | -0.671784000 | 3.307800000  | 2.236918000  |

|   |              |              |              |
|---|--------------|--------------|--------------|
| 1 | 0.800604000  | 2.863187000  | 3.150623000  |
| 8 | -1.913771000 | -2.252361000 | -1.142462000 |
| 1 | -2.032695000 | -1.316895000 | -1.450226000 |
| 1 | -2.484634000 | -2.383931000 | -0.270685000 |
| 8 | 3.003780000  | 0.810378000  | 1.392532000  |
| 1 | 3.566788000  | 0.778256000  | 0.606550000  |
| 1 | 2.757656000  | -0.114365000 | 1.569731000  |
| 8 | -3.071854000 | -2.501326000 | 1.054359000  |
| 1 | -2.282231000 | -2.635672000 | 1.613394000  |
| 1 | -3.360726000 | -1.598748000 | 1.251226000  |

SA<sub>2</sub>.DMA.OA.W<sub>4</sub>

|    |              |              |              |
|----|--------------|--------------|--------------|
| 16 | -0.059481000 | 1.814020000  | -0.471023000 |
| 8  | -0.884631000 | 2.961308000  | -0.651895000 |
| 8  | -0.695721000 | 0.512650000  | -0.514330000 |
| 8  | 1.061518000  | 1.872696000  | -1.551279000 |
| 8  | 0.725574000  | 1.859445000  | 0.862001000  |
| 1  | 1.547252000  | 0.979453000  | -1.583351000 |
| 1  | 1.584577000  | 2.442416000  | 0.782967000  |
| 16 | 3.013831000  | -0.625602000 | -0.280807000 |
| 8  | 2.186535000  | -0.424452000 | -1.487576000 |
| 8  | 3.855986000  | 0.515640000  | 0.019105000  |
| 8  | 2.233144000  | -1.165450000 | 0.813772000  |
| 8  | 4.000425000  | -1.827962000 | -0.650338000 |
| 1  | 1.615315000  | -0.245102000 | 2.412627000  |
| 1  | 4.709497000  | -1.482451000 | -1.210084000 |
| 8  | -0.993782000 | -1.374568000 | 1.916852000  |
| 6  | -1.888999000 | -0.405149000 | 1.865494000  |
| 8  | -1.854937000 | 0.619202000  | 2.484306000  |
| 6  | -2.993911000 | -0.708011000 | 0.838761000  |
| 8  | -4.066871000 | -0.012812000 | 1.031621000  |
| 8  | -2.809046000 | -1.495211000 | -0.072005000 |
| 1  | 0.444231000  | -1.404439000 | -0.358804000 |
| 1  | -4.682650000 | -0.106470000 | 0.230447000  |
| 6  | -0.254997000 | -2.170242000 | -2.138369000 |
| 7  | -0.132435000 | -2.196962000 | -0.665135000 |
| 6  | 0.455991000  | -3.443568000 | -0.132423000 |
| 1  | -0.664310000 | -1.205701000 | -2.428343000 |
| 1  | -0.923946000 | -2.972002000 | -2.445012000 |
| 1  | 0.732188000  | -2.299080000 | -2.574782000 |
| 1  | -1.066207000 | -2.024725000 | -0.249584000 |
| 1  | 0.488016000  | -3.369988000 | 0.950844000  |
| 1  | 1.466328000  | -3.545499000 | -0.523991000 |
| 1  | -0.161901000 | -4.284429000 | -0.441648000 |

|   |              |              |              |
|---|--------------|--------------|--------------|
| 8 | 0.933295000  | -0.188310000 | 3.100670000  |
| 1 | 0.529601000  | 0.685539000  | 3.004151000  |
| 1 | -0.215736000 | -1.026627000 | 2.474723000  |
| 8 | -5.367311000 | -0.043521000 | -1.180099000 |
| 1 | -5.378707000 | -0.910560000 | -1.595790000 |
| 1 | -4.644963000 | 0.455367000  | -1.620442000 |
| 8 | -3.087811000 | 1.205422000  | -1.974703000 |
| 1 | -2.365367000 | 0.752688000  | -1.514253000 |
| 1 | -2.932078000 | 2.135811000  | -1.772218000 |
| 8 | 2.920180000  | 3.024606000  | 0.636429000  |
| 1 | 3.438215000  | 2.227118000  | 0.408842000  |
| 1 | 2.977219000  | 3.615077000  | -0.122104000 |
